# Supplementary material for: Covalently functionalized layered MoS2 supported Pd nanoparticles as highly active oxygen reduction electrocatalysts
Source: Royal Society of Chemistry journal article supplement (doi:10.1039/d0nr04446f), 2020-01-01
Supplement: d0nr04446f1.pdf [file d0nr04446f1.pdf]

ELECTRONIC SUPPORTING INFORMATION

Covalently functionalized layered MoS<sub>2</sub> supported Pd nanoparticles as highly active oxygen reduction electrocatalyst

*Dimitrios K. Perivoliotis<sup>\*a</sup>, Yuta Satob, Kazu Suenagab and Nikos Tagmatarchis<sup>\*a</sup>*

<sup>a</sup> Theoretical and Physical Chemistry Institute, National Hellenic Research Foundation, 48

Vassileos Constantinou Avenue, 11635 Athens, Greece

<sup>b</sup> Nanomaterials Research Institute, National Institute of Advanced Industrial Science and

Technology (AIST), Central 5, 1-1-1 Higashi, Tsukuba 305-8565, Japan

**Corresponding Authors**

\* E-mail: [tagmatar@eie.gr](mailto:tagmatar@eie.gr) (N. Tagmatarchis); [dimper@eie.gr](mailto:dimper@eie.gr) (D. Perivoliotis)

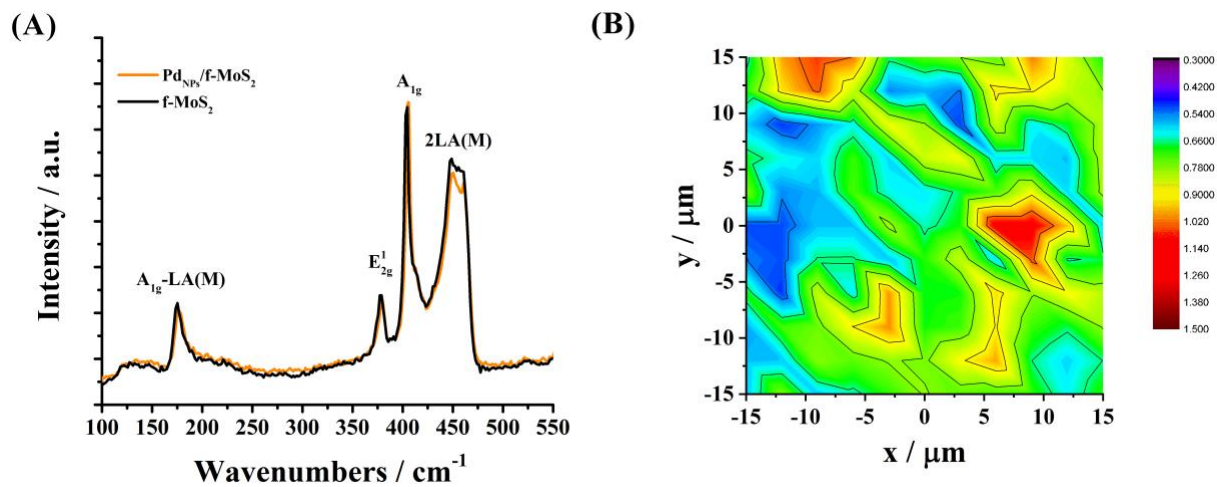

**Figure S1.** (A) Raman spectra for  $Pd_{NPs}/f-MoS_2$  (orange) and functionalized  $MoS_2$  (black); (B) Raman mapping upon excitation at 633 nm of the  $2LA(M)/A_{1g}$  intensity ratio of a  $30 \times 30 \mu m^2$  area (121 acquisition points in total) for  $Pd_{NPs}/f-MoS_2$  hybrid material. In Figure S1A we present a representative Raman mapping, close to the total average of five.

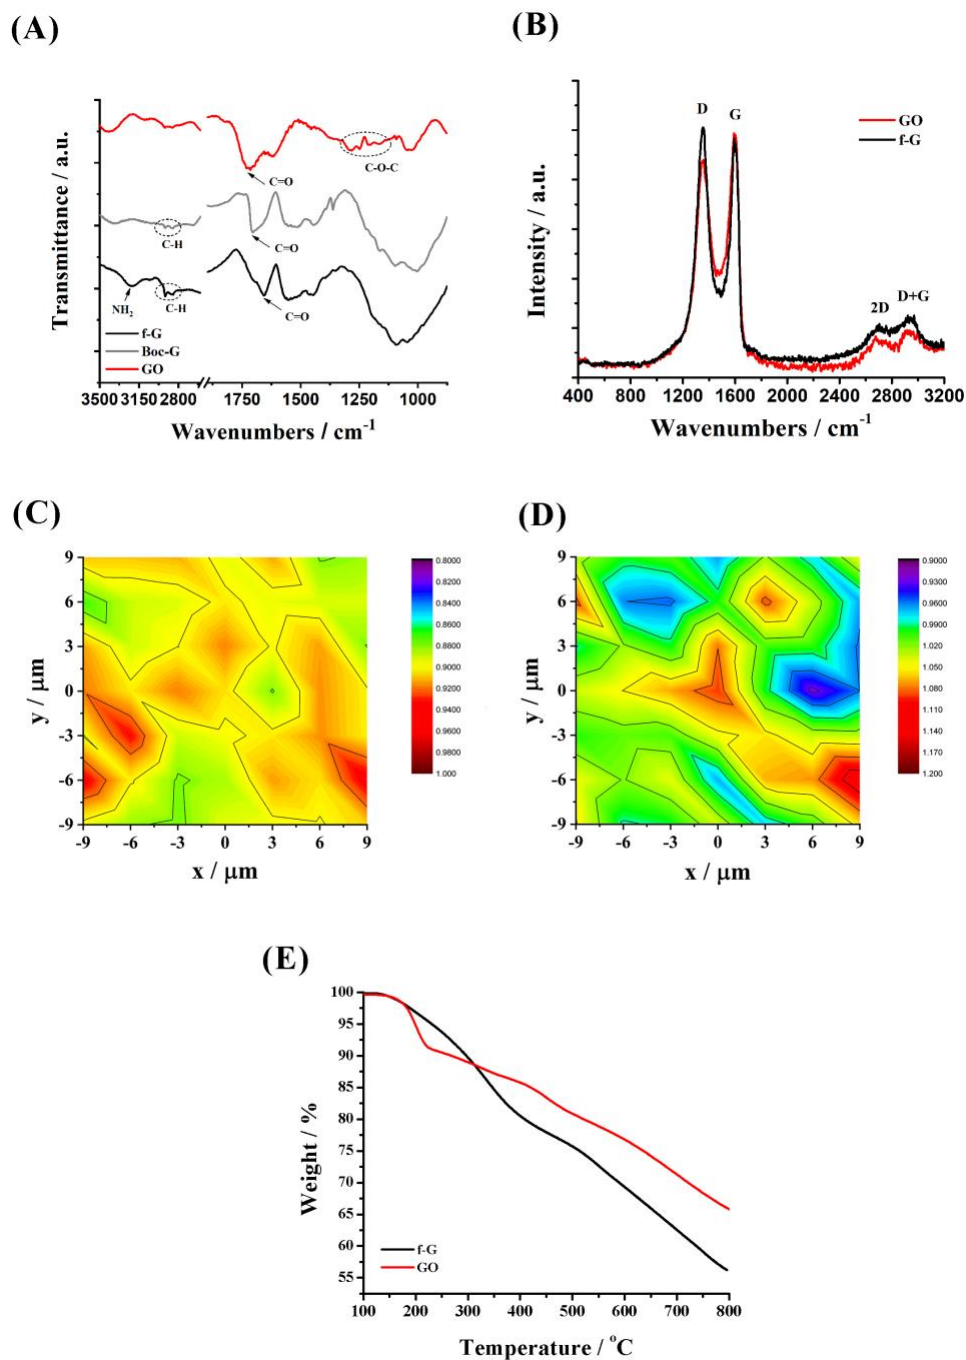

**Figure S2.** (A) ATR-IR spectra for amino functionalized graphene (black), BOC modified graphene (gray) and GO (red); (B) Raman spectra for f-G (black) and GO (red) upon excitation at 514 nm; (C, D) Raman mapping upon excitation at 514 nm of the D/G intensity ratio of a 18 x 18 mm<sup>2</sup> area (49 acquisition points in total) for GO and f-G, respectively. In Figure S2B we present a representative Raman mapping, close to the total average of five. (E) Thermographs for f-G (black) and GO (red).

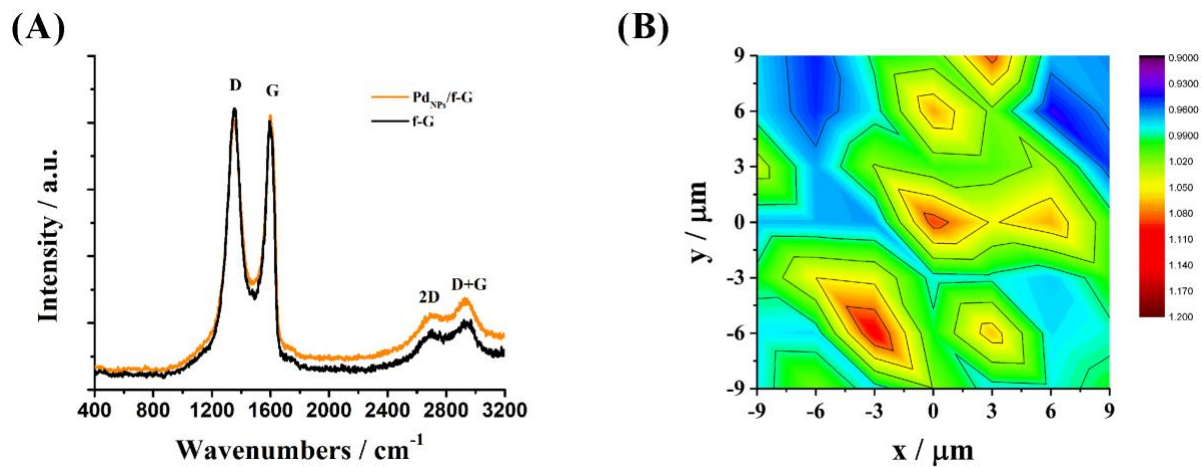

**Figure S3.** (A) Raman spectra for Pd<sub>NPs</sub>/f-G (orange) and f-G (black); (B) Raman mapping upon excitation at 514 nm of the D/G intensity ratio of a 18 x 18 mm<sup>2</sup> area (49 acquisition points in total) for Pd<sub>NPs</sub>/f-G hybrid material. In Figure S3A we present a representative Raman mapping, close to the total average of five.

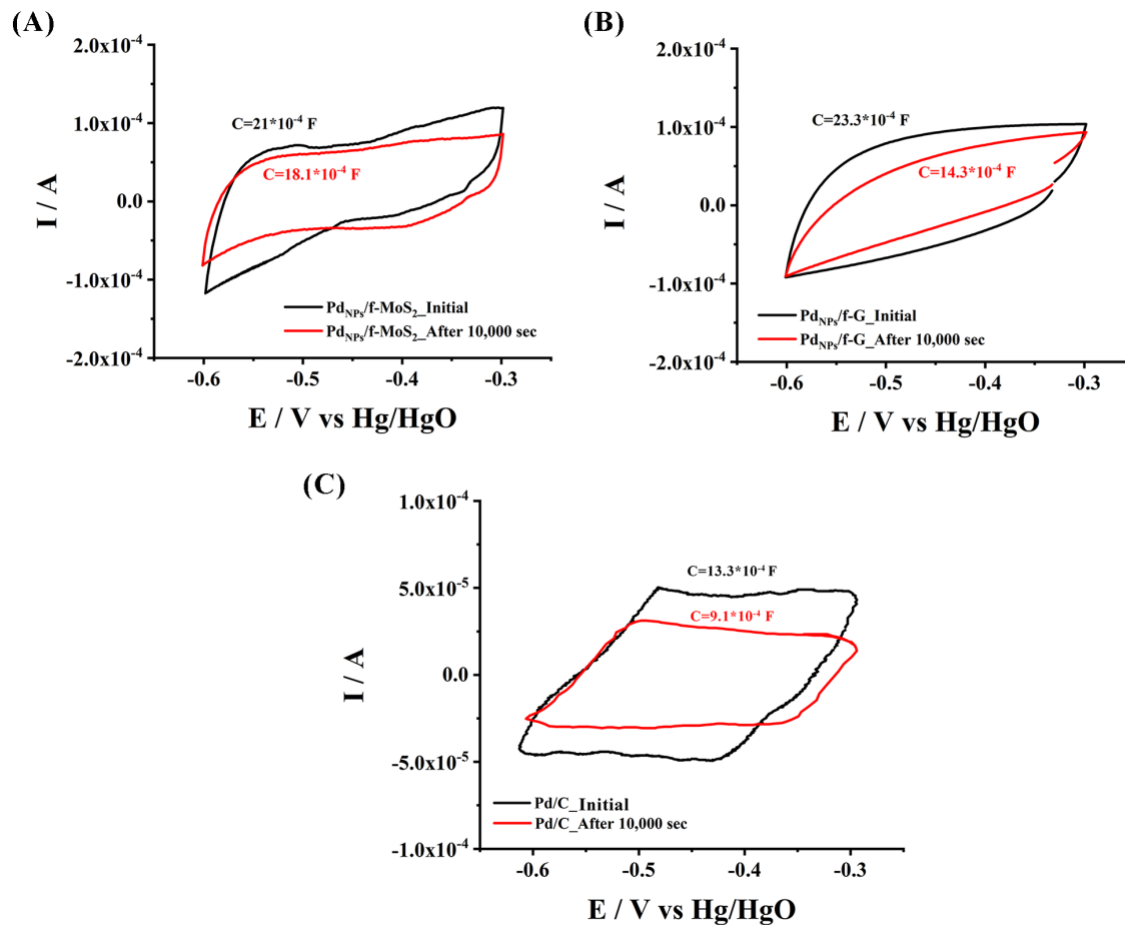

**Figure S4.** Cyclic voltammetry curves for (A)  $\text{Pd}_{\text{NPs}}/\text{f-MoS}_2$ , (B)  $\text{Pd}_{\text{NPs}}/\text{f-G}$  hybrids and (C)  $\text{Pd/C}$  before and after the chronoamperometric essays. The CV curves obtained at the “double layer region” ( $-0.6 - 0.3$  V vs Hg/HgO) recorded in  $\text{N}_2$  saturated aqueous  $0.1$  M KOH solution at a scan rate  $50$  mV/sec. The capacitance values were calculated for each case using the Equation 6.

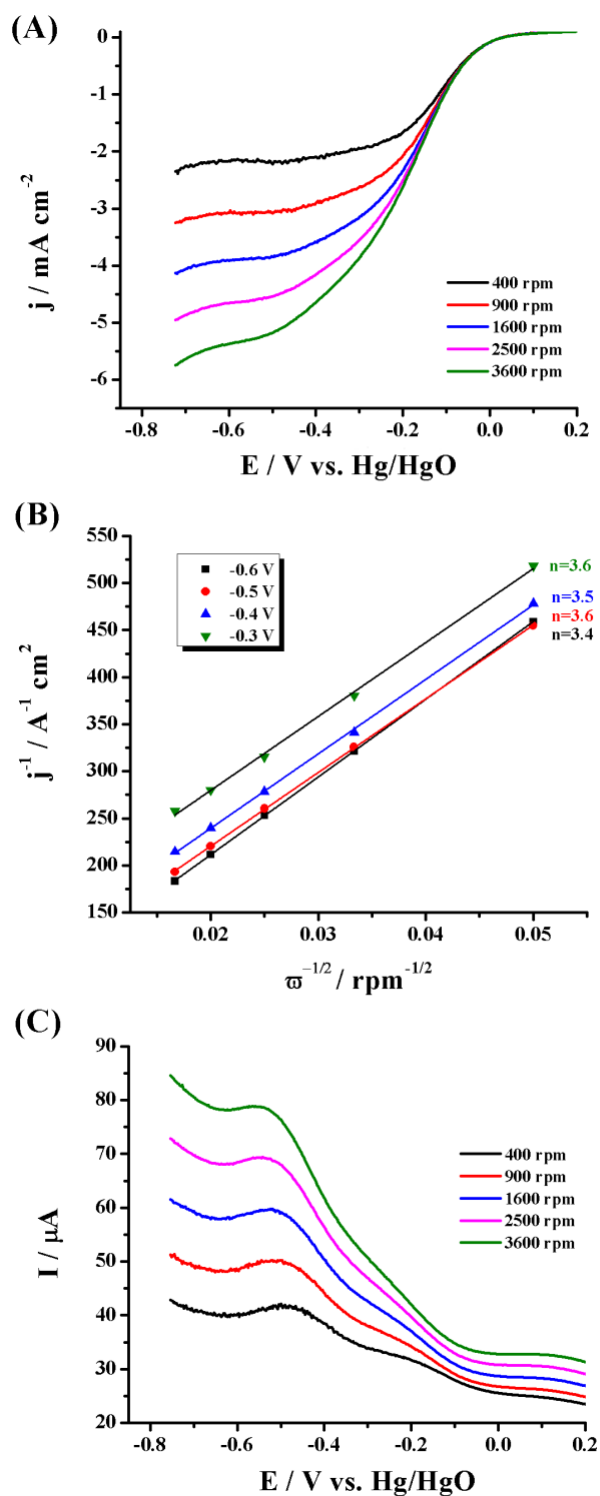

**Figure S5.** (A) ORR polarization curves at different rotation rates (400-3600 rpm) for PdNPs/f-G, (B) the corresponding K-L plots and (C) ring response. All measurements were conducted in O<sub>2</sub>-saturated aqueous 0.1M KOH electrolyte, and the corresponding LSV polarization curves were recorded at a scan rate of 5 mVs<sup>-1</sup>. The ring potential was fixed at 1.0 V vs Hg/HgO. The current densities in (A) are normalized to the geometric electrode area.

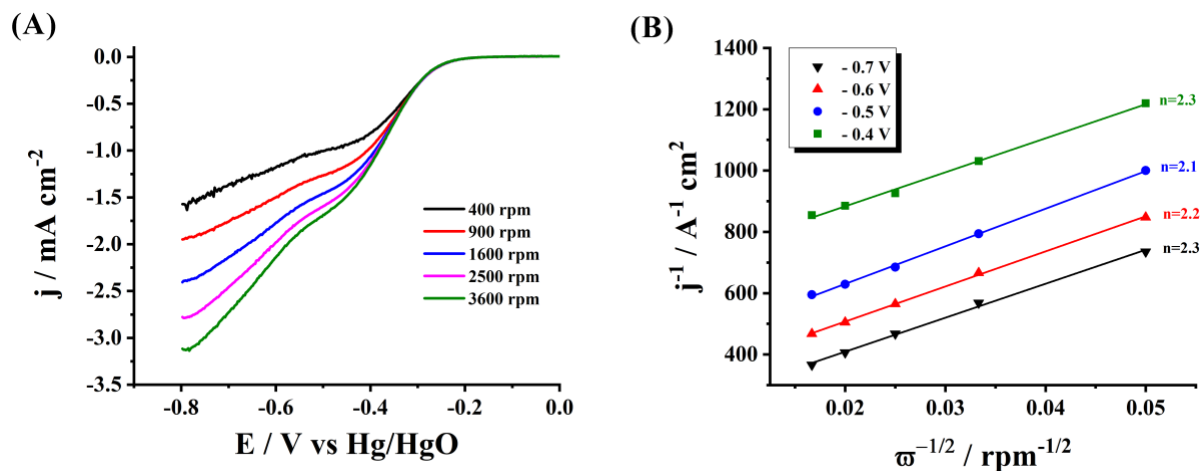

**Figure S6.** (A) ORR polarization curves at different rotation rates (400-3600 rpm) for *f*-MoS<sub>2</sub> and (B) the corresponding K-L plots. All measurements were conducted in O<sub>2</sub>-saturated aqueous 0.1 M KOH electrolyte, and the corresponding LSV polarization curves were recorded at a scan rate of 5 mV/s. The current densities are normalized to the geometric electrode area.

**Table S1.** Performance analysis of recently developed hybrid MoS<sub>2</sub>-based electrocatalysts for the ORR.

|                                                                        |                                     |                                                                                                                                                                                                                                                                                                                                                                                                                        |           |
|------------------------------------------------------------------------|-------------------------------------|------------------------------------------------------------------------------------------------------------------------------------------------------------------------------------------------------------------------------------------------------------------------------------------------------------------------------------------------------------------------------------------------------------------------|-----------|
| PdNPs (~9nm) on MoS <sub>2</sub> nanosheets                            | O <sub>2</sub> -saturated 0.1 M KOH | Onset potential: -0.10 V vs. SCE<br>Half-wave potential: -0.20 V vs. SCE<br>Diffusion limited current density: 5.2 mA cm <sup>-2</sup> at 1600 rpm<br>Mass activity: 0.55 mA μgPd <sup>-1</sup> @ -0.26 V vs. SCE<br>Specific activity: 1.02 mA cm <sup>2</sup> EC <sub>SA</sub> <sup>-2</sup> @ -0.26 V vs. SCE<br>Electron transfer number: 3.6 – 4.0<br>Stability: after 4,000 cycles, no significant activity loss | 1         |
| PdSNPs (40-50nm) on MoS <sub>2</sub> /N-G heterostructure              | O <sub>2</sub> -saturated 0.1 M KOH | Onset potential: -0.141 V vs. SCE<br>Half-wave potential: -0.214 V vs. SCE<br>Diffusion limited current density: 4.1 mA cm <sup>-2</sup> at 1600 rpm<br>Electron transfer number: 3.75 – 3.82<br>Stability: after 1,000 cycles / 16,000 sec , no significant activity loss<br>Methanol tolerance: up to 0.1 M CH <sub>3</sub> OH                                                                                       | 2         |
| PdNPs (2-3nm) on covalently functionalized MoS <sub>2</sub> nanosheets | O <sub>2</sub> -saturated 0.1 M KOH | Onset potential: +0.066 V vs. Hg/HgO<br>Half-wave potential: -0.116 V vs. Hg/HgO<br>Diffusion limited current density: 5.7 mA cm <sup>-2</sup> at 1600 rpm<br>Kinetic current density: 2.65 mA cm <sup>-2</sup> at -60 mV vs. Hg/HgO<br>Electron transfer number: 3.6 – 4.0<br>Stability: after 10,000 sec, 16.5 % loss of its initial activity                                                                        | This work |

1. L.-X. Zuo, L.-P. Jiang and J.-J. Zhu, *Ultrason. Sonochem.*, 2017, **35**, 681-688.
2. L. G. Bach, M. L. N. Thi, Q. B. Bui and H. T. Nhac-Vu, *Synth. Met.*, 2019, **254**, 172-179.
